# Supplementary material
Source: PubMed Central journal article supplement (PMC7490747)
Supplement: jamapediatr-e203009-s001.pdf [file jamapediatr-e203009-s001.pdf]

## Supplementary Online Content

Messinger CJ, Lipsitch M, Bateman BT, et al. Association between congenital cytomegalovirus and the prevalence at birth of microcephaly in the United States. *JAMA Pediatr*. Published online September 14, 2020. doi:10.1001/jamapediatrics.2020.3009

**eTable 1.** Sensitivity analyses for the case definition of microcephaly for Medicaid Analytic eXtract (MAX) (2000-2013) and MarketScan (2011-2015) databases

**eTable 2.** Sensitivity analyses for congenital cytomegalovirus (cCMV) diagnosis and testing windows in infant records in pooled Medicaid Analytic eXtract (MAX) (2000-2013) and MarketScan (2011-2015) databases

This supplementary material has been provided by the authors to give readers additional information about their work.

**eTable 1.** Sensitivity analyses for the case definition of microcephaly for Medicaid Analytic eXtract (MAX) (2000-2013) and MarketScan (2011-2015) databases

| Sensitivity Analysis                                                                                                                          | Microcephaly Prevalence at Birth<br>(cases per 10,000 live births) |            |                |
|-----------------------------------------------------------------------------------------------------------------------------------------------|--------------------------------------------------------------------|------------|----------------|
|                                                                                                                                               | MAX                                                                | MarketScan | Pooled Dataset |
| <i>Require 1 code for microcephaly (ICD 742.1)</i>                                                                                            |                                                                    |            |                |
| No exclusions                                                                                                                                 | 8.3                                                                | 6.0        | 7.7            |
| Exclude chromosomal anomalies; Reclassify infants with comorbid NTDs as non-cases                                                             | 6.4                                                                | 4.6        | 5.8            |
| <i>Require 1 microcephaly code (ICD 742.1) + ≥1 additional code<sup>a</sup></i>                                                               |                                                                    |            |                |
| No exclusions                                                                                                                                 | 4.1                                                                | 3.5        | 4.0            |
| Exclude chromosomal anomalies; Reclassify infants with comorbid NTDs as non-cases (primary case definition)                                   | <b>3.1</b>                                                         | <b>2.4</b> | <b>2.9</b>     |
| Exclude chromosomal anomalies; Reclassify infants with comorbid NTDs or major structural malformations <sup>b</sup> as non-cases              | 2.3                                                                | 1.4        | 2.1            |
| Exclude chromosomal anomalies; Reclassify infants with comorbid NTDs as non-cases; require presence of ≥ 1 comorbid sign of cCMV <sup>c</sup> | 0.32                                                               | 0.55       | 0.38           |
| Exclude chromosomal anomalies; Exclude infants with SGA or preterm; Reclassify infants with comorbid NTDs as non-cases                        | 1.6                                                                | 1.2        | 1.5            |

<sup>a</sup> See Methods for description of 2-code algorithm

<sup>b</sup> Major structural malformations defined as the presence of cardiovascular, other vascular, respiratory, oral cleft, gastrointestinal, genital, urinary, musculoskeletal, limb, or other anomalies; reclassified to further exclude syndromic infants from case definition

<sup>c</sup> Comorbid signs of cCMV defined as presence of ≥ 1 code for any of chorioretinitis, eye anomalies, neonatal seizures, or hearing loss; required to increase specificity for microcephaly phenotype consistent with cCMV

**eTable 2.** Sensitivity analyses for congenital cytomegalovirus (cCMV) diagnosis and testing windows in infant records in pooled Medicaid Analytic eXtract (MAX) (2000-2013) and MarketScan (2011-2015) databases

| cCMV diagnosis window | cCMV test window | Tested for cCMV (N) | cCMV+ diagnosis, N (%) | Microcephaly diagnosis, N (%) | Summary PR (95% CI) <sup>a</sup> |
|-----------------------|------------------|---------------------|------------------------|-------------------------------|----------------------------------|
| Birth – 90 days       | Birth – 30 days  | 572                 | 28 (4.9)               | 13 (2.3)                      | 15 (5.6-41) <sup>b</sup>         |
| Birth – 90 days       | Birth – 90 days  | 940                 | 49 (5.2)               | 19 (2.0)                      | 10 (4.2-24)                      |
| Birth – 30 days       | Birth – 30 days  | 572                 | 26 (4.5)               | 13 (2.3)                      | 16 (6.0-44)                      |

<sup>a</sup> Prevalence Ratio (PR) of microcephaly among infants with a cCMV diagnosis divided by that in those without a cCMV diagnosis

<sup>b</sup> Primary analysis presented in main body of article
